# Supplementary material
Source: publisher figshare collection journal article supplement (https://acs.figshare.com/ndownloader/files/5100499)

## Supplementary Information:

**Figure 1S.** Photographs of dried sample spots of increasing volume (2-5  $\mu$ l) and organic content (50:50, 70:30, 80:20 ACN/dd H<sub>2</sub>O) on spot with SILCLEAN 3700 and water mask.

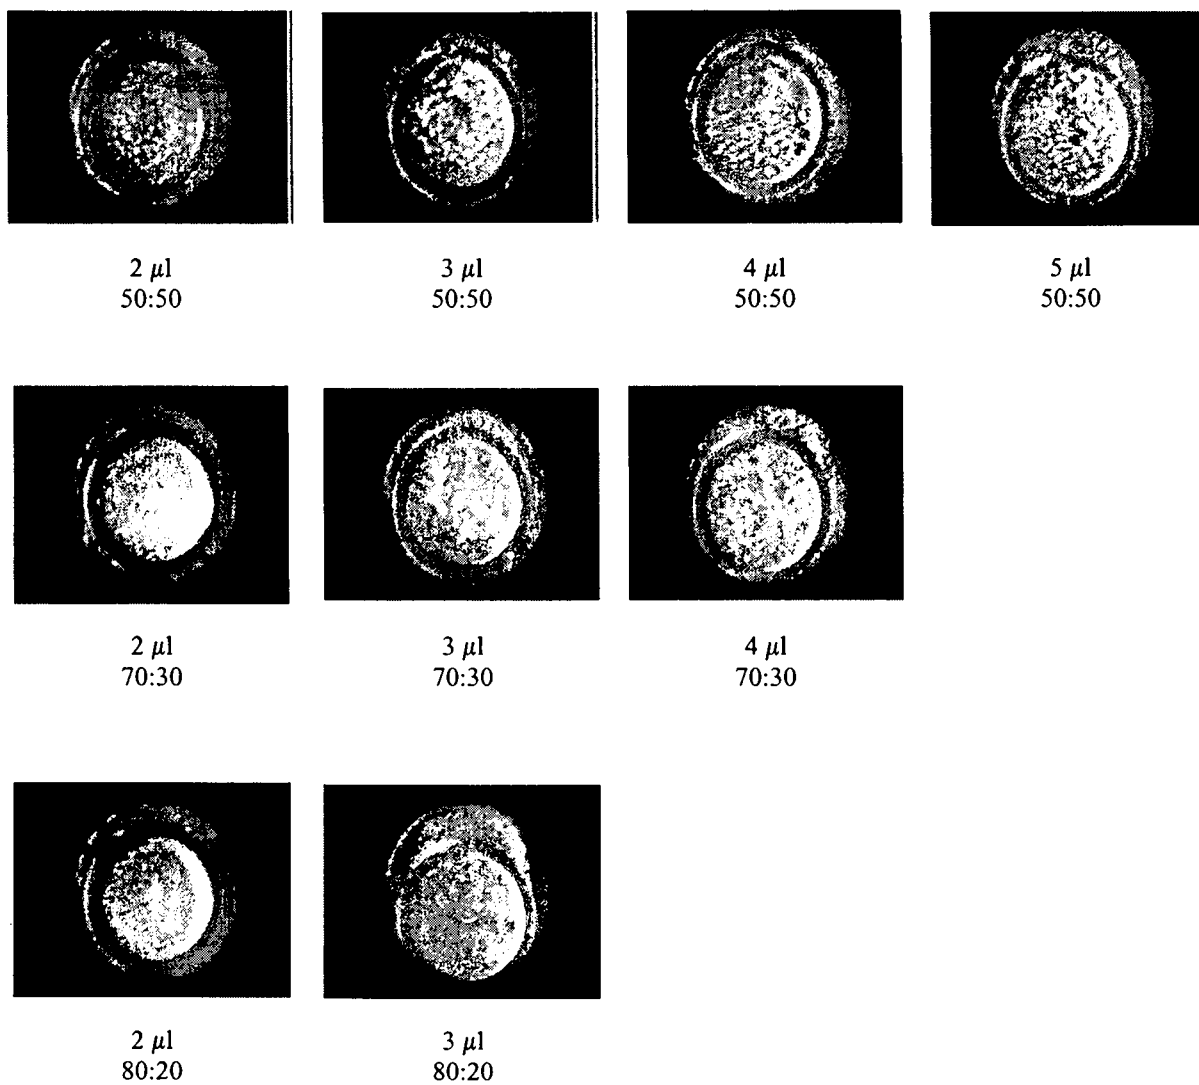

Supplement: Supplementary file 1 [file 5100499]
